# Supplementary material
Source: PubMed Central journal article supplement (PMC6195127)
Supplement: NIHMS1506351-supplement-4.pdf [file NIHMS1506351-supplement-4.pdf]

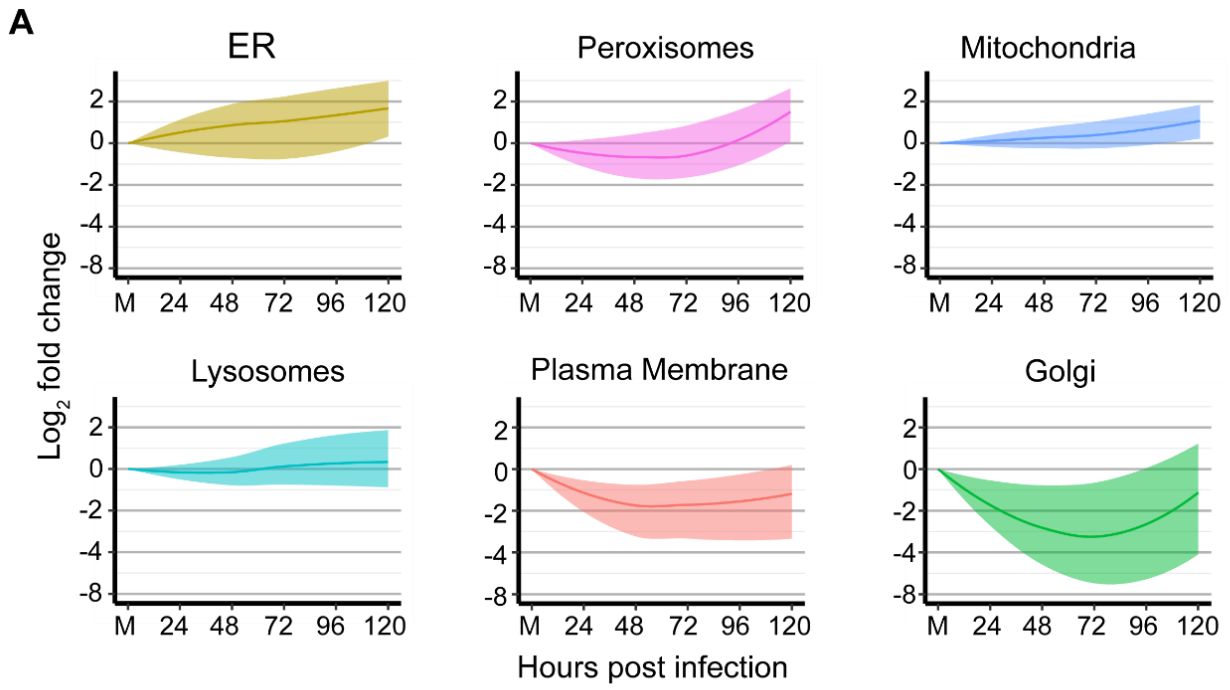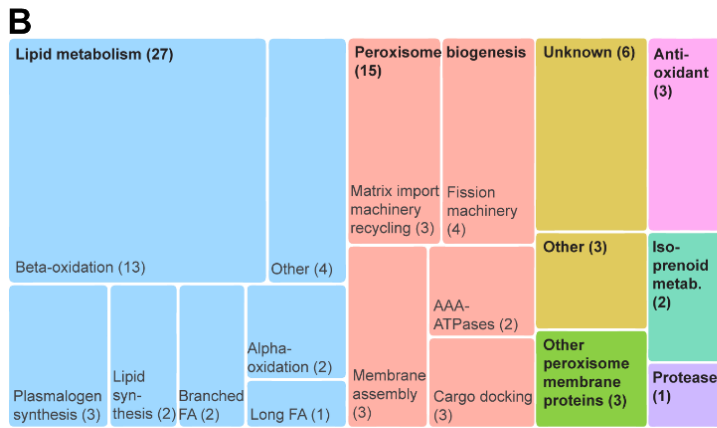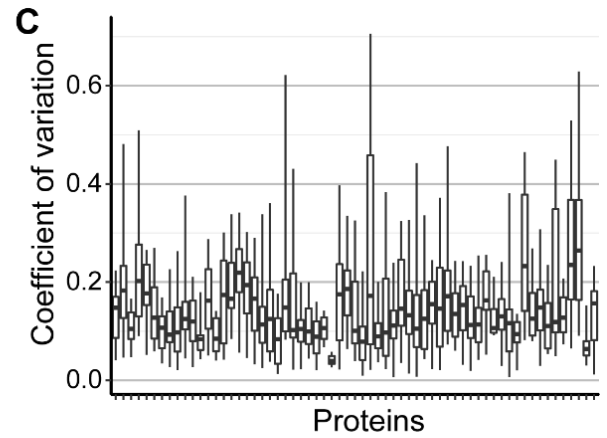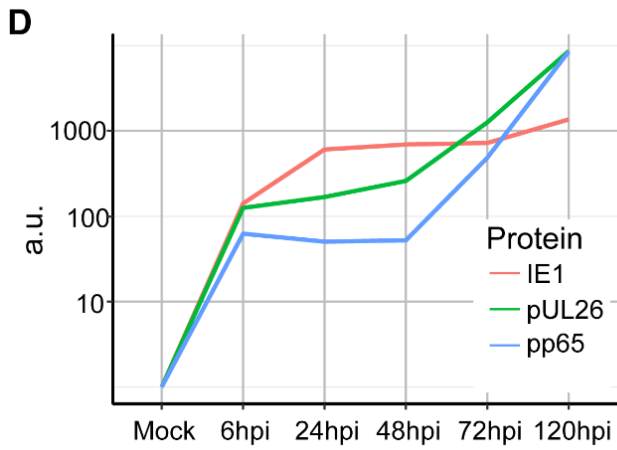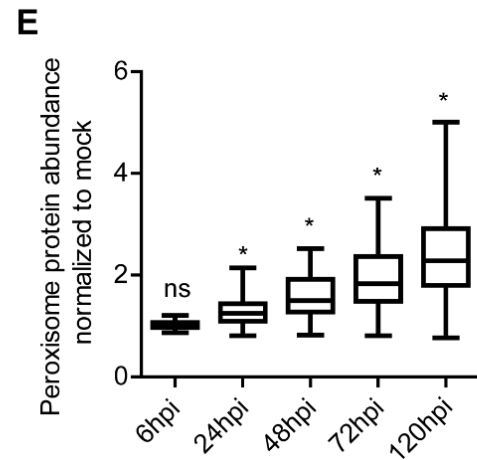

**Figure S1. Data quality assessment and additional analyses of the peroxisome proteome quantification during HCMV infection. Related to Fig 1.**

A) Means (solid lines) and inter-quartile ranges (shades) of organelle proteomes throughout the infectious cycle from data collected in our previous proteomic study (Jean Beltran et al., 2016). Note that the magnitude of this increase late in infection was similar to the functionally-relevant HCMV-induced increases in ER and mitochondria protein abundances

B) Tree map showing the number of proteins quantified from different peroxisome functional categories. Categories are shown in bold colored fonts and subcategories in normal font with numbers indicating the number of proteins.

C) Boxplots summarizing the coefficient of variation of individual peptides from all samples (n=18) across replicates. Boxes show inter-quartile range (IQR) and whiskers show the full range of values.

D) Abundance of viral proteins from three viral genes representing IE (UL123), DE (UL26), and L (UL83) kinetic classes. Y-axis is shown in a log<sub>10</sub> scale. Note that the abundances detected in the mock sample were at background level for all three proteins

E) Boxplots summarizing the abundance of all peroxisome proteins detected by PRM relative to mock. Boxes show inter-quartile range (IQR) and whiskers show the full range of values. ANOVA followed by Dunn's multiple comparison test was used to assess significant changes relative to mock (ns, not significant; \* p<0.05)

**A**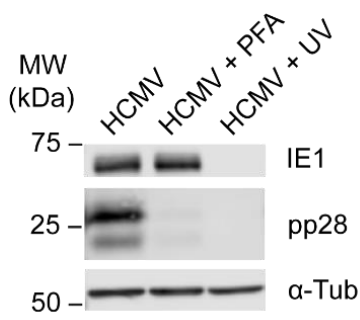**B**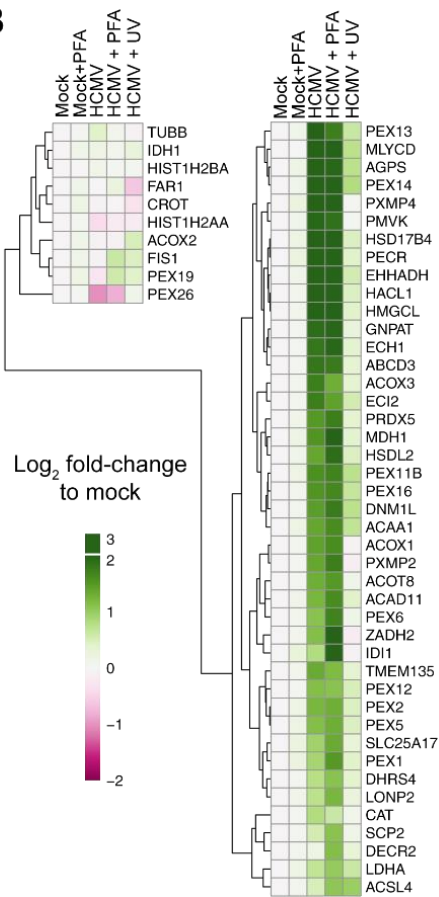**C**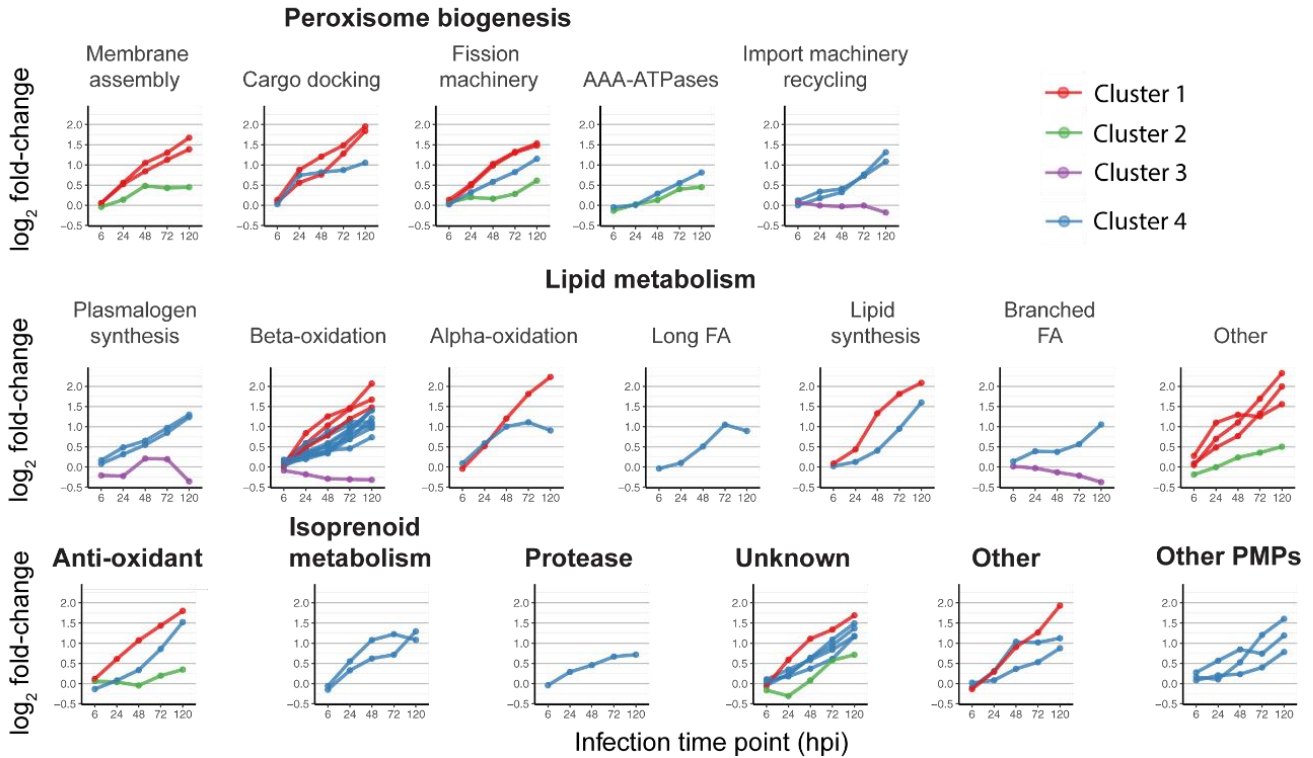

**Figure S2. Temporal kinetics and functions associated with peroxisome protein abundances during HCMV infection. Related to Fig 1.**

A) Western blot analysis of immediate early (IE1) and late (pp28) viral gene expression in infected cells treated with phosphonoformate (PFA) or with cells infected with UV-inactivated virus at 120 hpi. Tubulin used as loading control.

B) Heatmap of peroxisome protein abundance in uninfected (Mock), uninfected with PFA treatment (Mock+PFA), 120hpi with normal HCMV (HCMV), 120hpi during PFA treatment (HCMV + PFA), and 120hpi with UV-inactivated HCMV (HCMV + UV).

C) Log<sub>2</sub> fold-change abundance values of peroxisome proteins through infection. Proteins were grouped according to their functions. Colors indicate 4 clusters obtained by hierarchical clustering (Fig 1C).

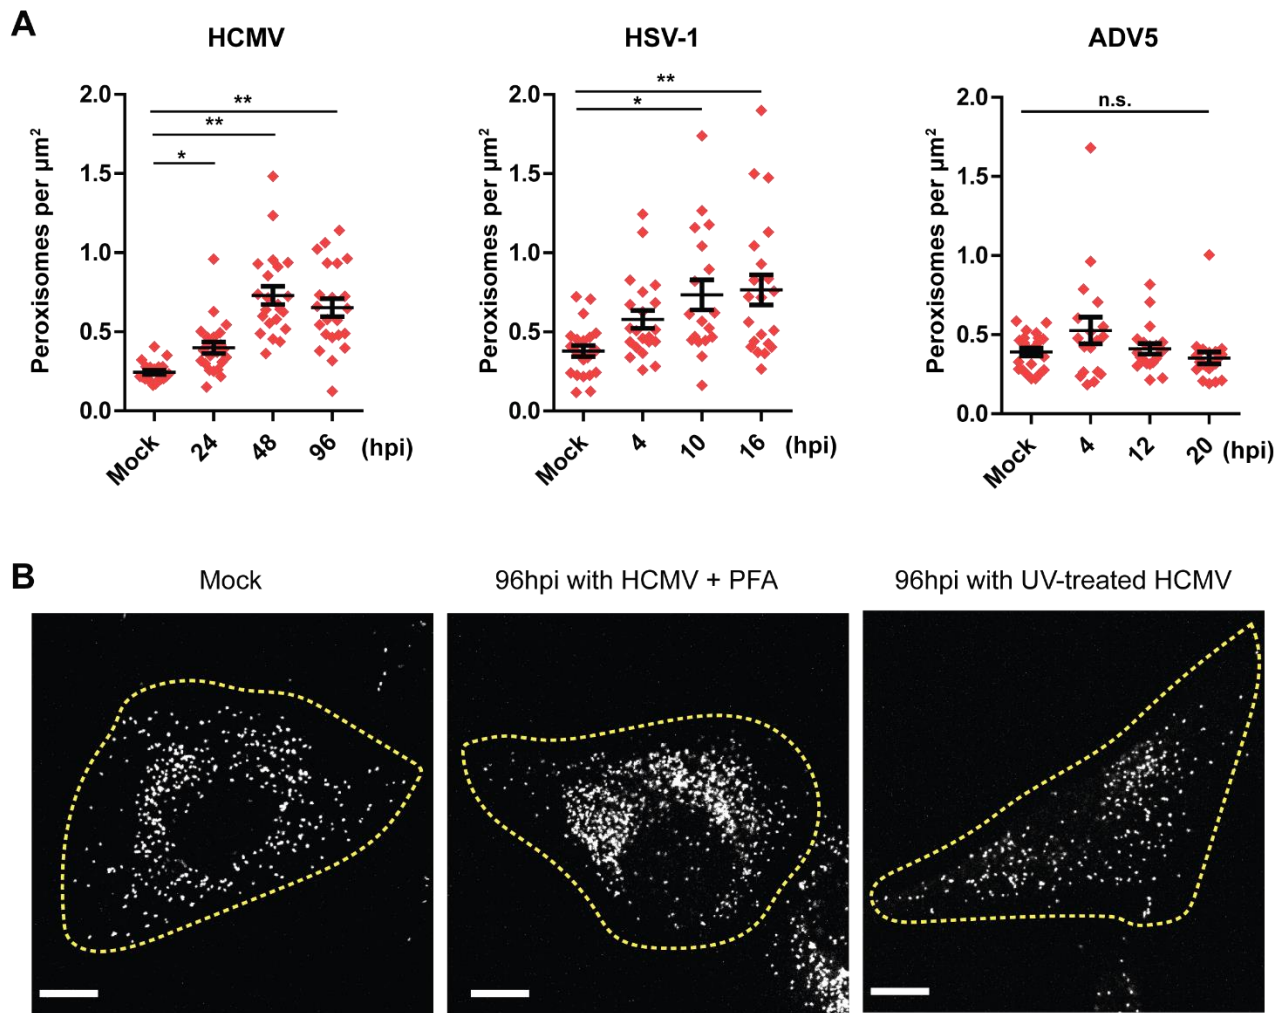

**Figure S3. Peroxisome abundance in infected cells during PFA treatment. Related to Figure 2.**

A) Peroxisome numbers normalized to cell area in  $\mu\text{m}^2$  shown for cells infected with HCMV (left), HSV-1 (middle), or ADV5 (right) at the indicated time points after infection. Statistical significance marked with (\*) for  $P < 0.05$ , and (\*\*) for  $P < 0.01$ .

B) IF analysis of peroxisomes using anti-PEX14 from HF cells either uninfected (left), infected and treated with PFA (middle), or infected with UV-irradiated viruses (right). Scale bar =  $10\mu\text{m}$ .

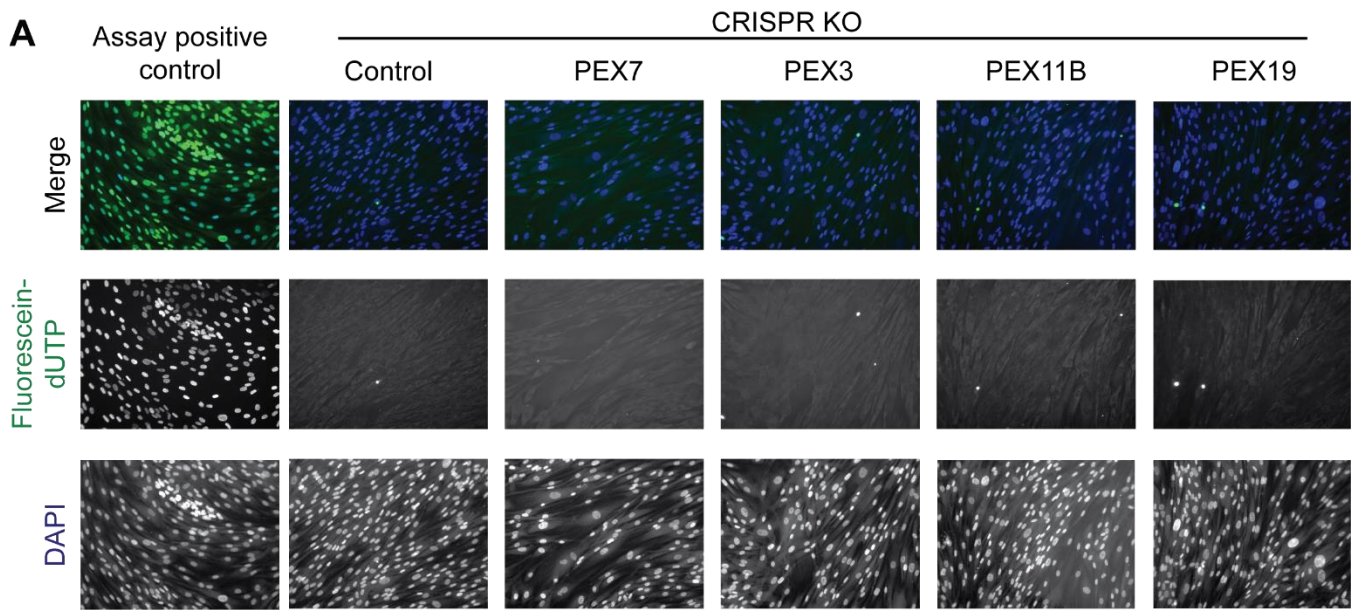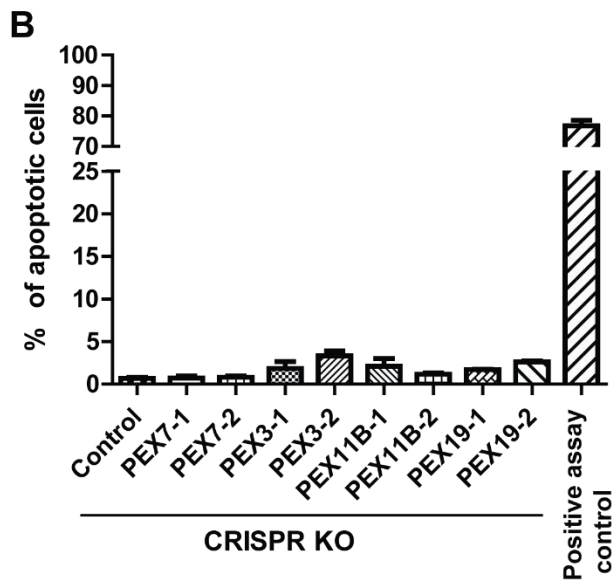

**Figure S4. Viability of CRISPR KO cell lines. Related to Figure 3.**

A) Cell viability was assessed by TUNEL assay through detection of DNA breaks using fluorescein-dUTP. As positive control, DNA breaks were induced with DNase I.

B) Percent of apoptotic cells across CRISPR KO cell lines and non-targeting CRISPR control.

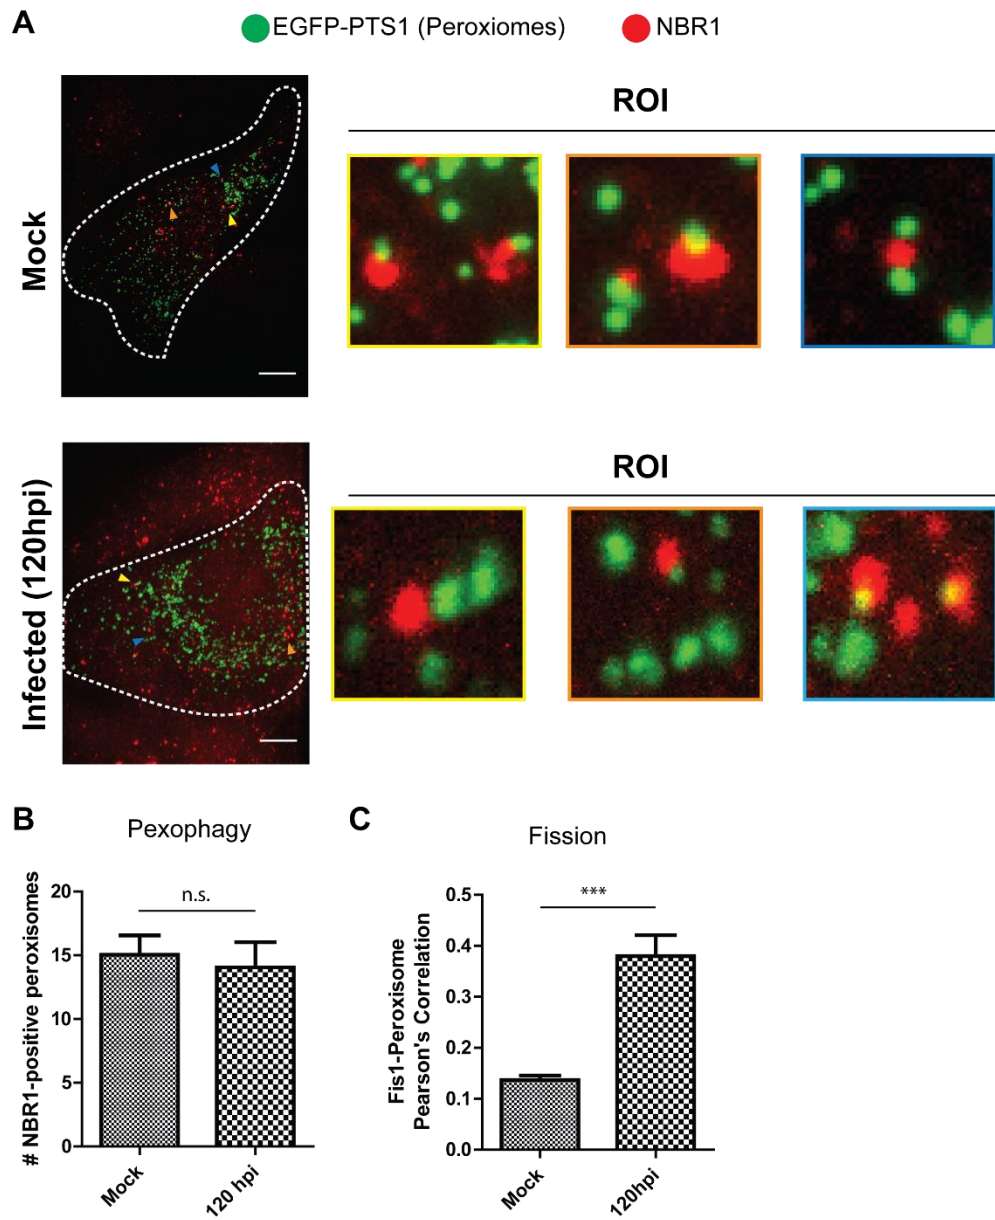

**Figure S5. Pexophagy analysis during HCMV infection. Related to Figure 4.**

A) Immunofluorescence analysis of NBR1 and peroxisomes EGFP-PTS1 in uninfected (Mock) and infected at 120hpi. ROIs show examples of NBR1 association with peroxisomes. Scale bars represent 10 $\mu$ m.

B) Number of NBR1-positive peroxisomes were counted in uninfected or infected cells. N > 15 cells.

C) Data as in Fig 4G showing colocalization of Fis1 with peroxisomes in uninfected and infected (120 hpi) conditions for comparison. N > 10 cells. Statistical significance determined by t-test and marked with (\*) for P<0.05, (\*\*) for P<0.01, (\*\*\*) for P<0.001, or n.s. for no statistical significance.

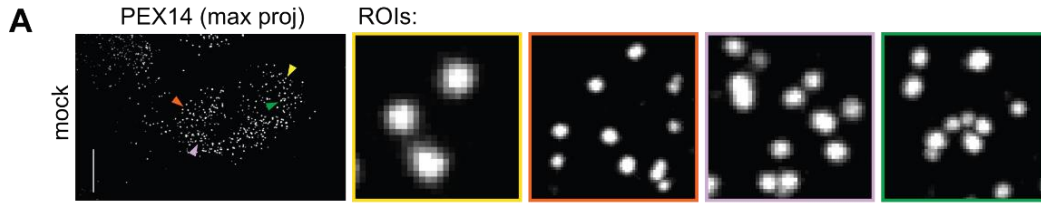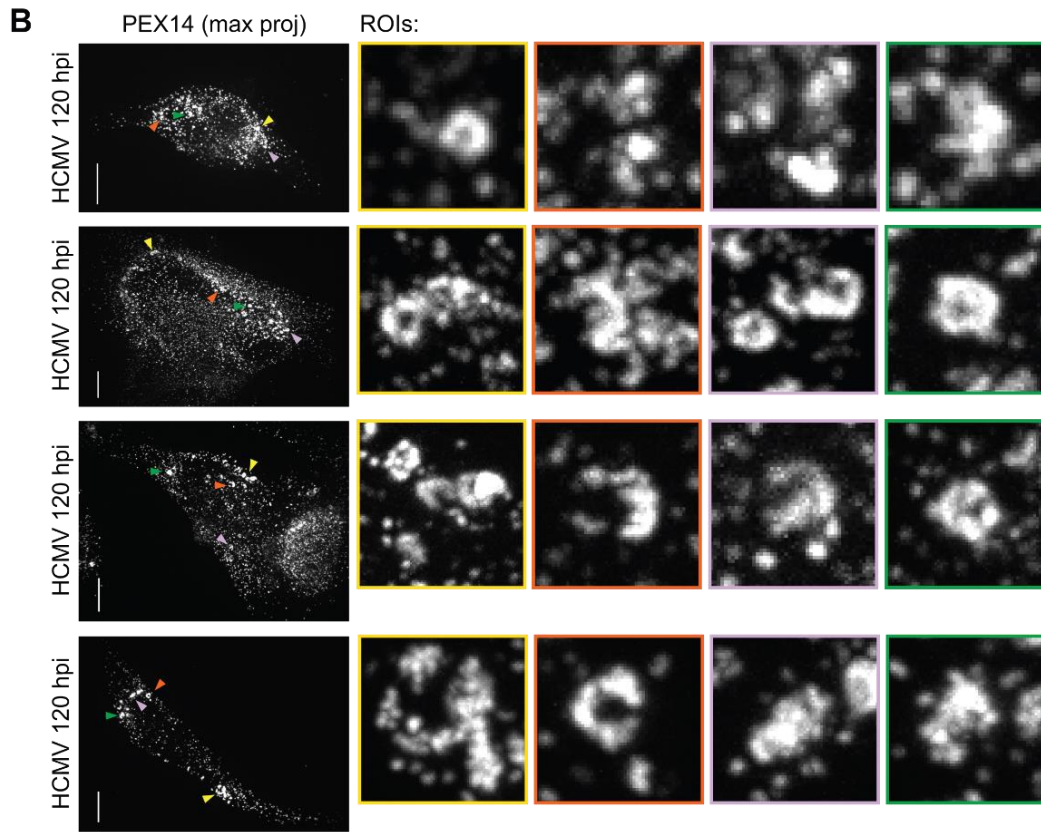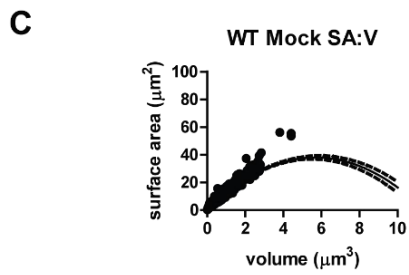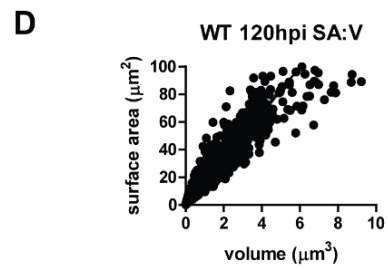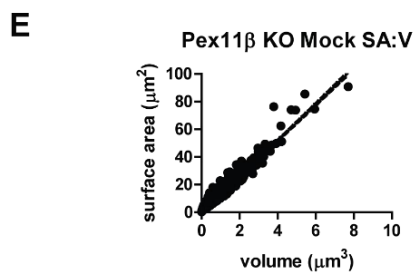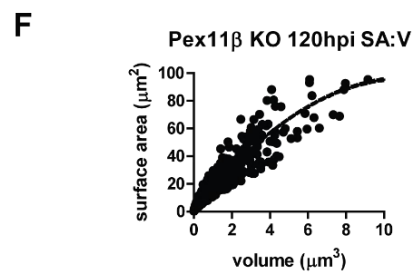



**Figure S6. HCMV infection disrupts peroxisome shape and size. Related to Figure 5.**

A-B) Maximum projections of A) mock and B) HCMV-infected cells at 120hpi labelled with anti-PEX14 and imaged at 100X. Arrowheads indicate ROIs in the corresponding color. Scale bars represent 10 $\mu$ m.

C-F) Plot of the surface area and volume of individual peroxisomes in (C) uninfected wild type (WT) cells (mean SA:V = 21.4  $\mu$ m<sup>-1</sup>), (D) WT cells 120 hpi (mean SA:V = 31.04  $\mu$ m<sup>-1</sup>), (E) uninfected PEX11B KOs (mean SA:V = 21.3  $\mu$ m<sup>-1</sup>), (F) PEX11B KOs, 120 hpi (mean SA:V = 30.2  $\mu$ m<sup>-1</sup>). Solid line indicates the regression curve, dashed lines indicate the upper and lower 95% confidence intervals. N = 23868 peroxisomes in WT Mock; N = 33958 in WT 120 hpi; N = 7391 in Pex11B KO Mock; N = 16708 in Pex11B KO 120 hpi.

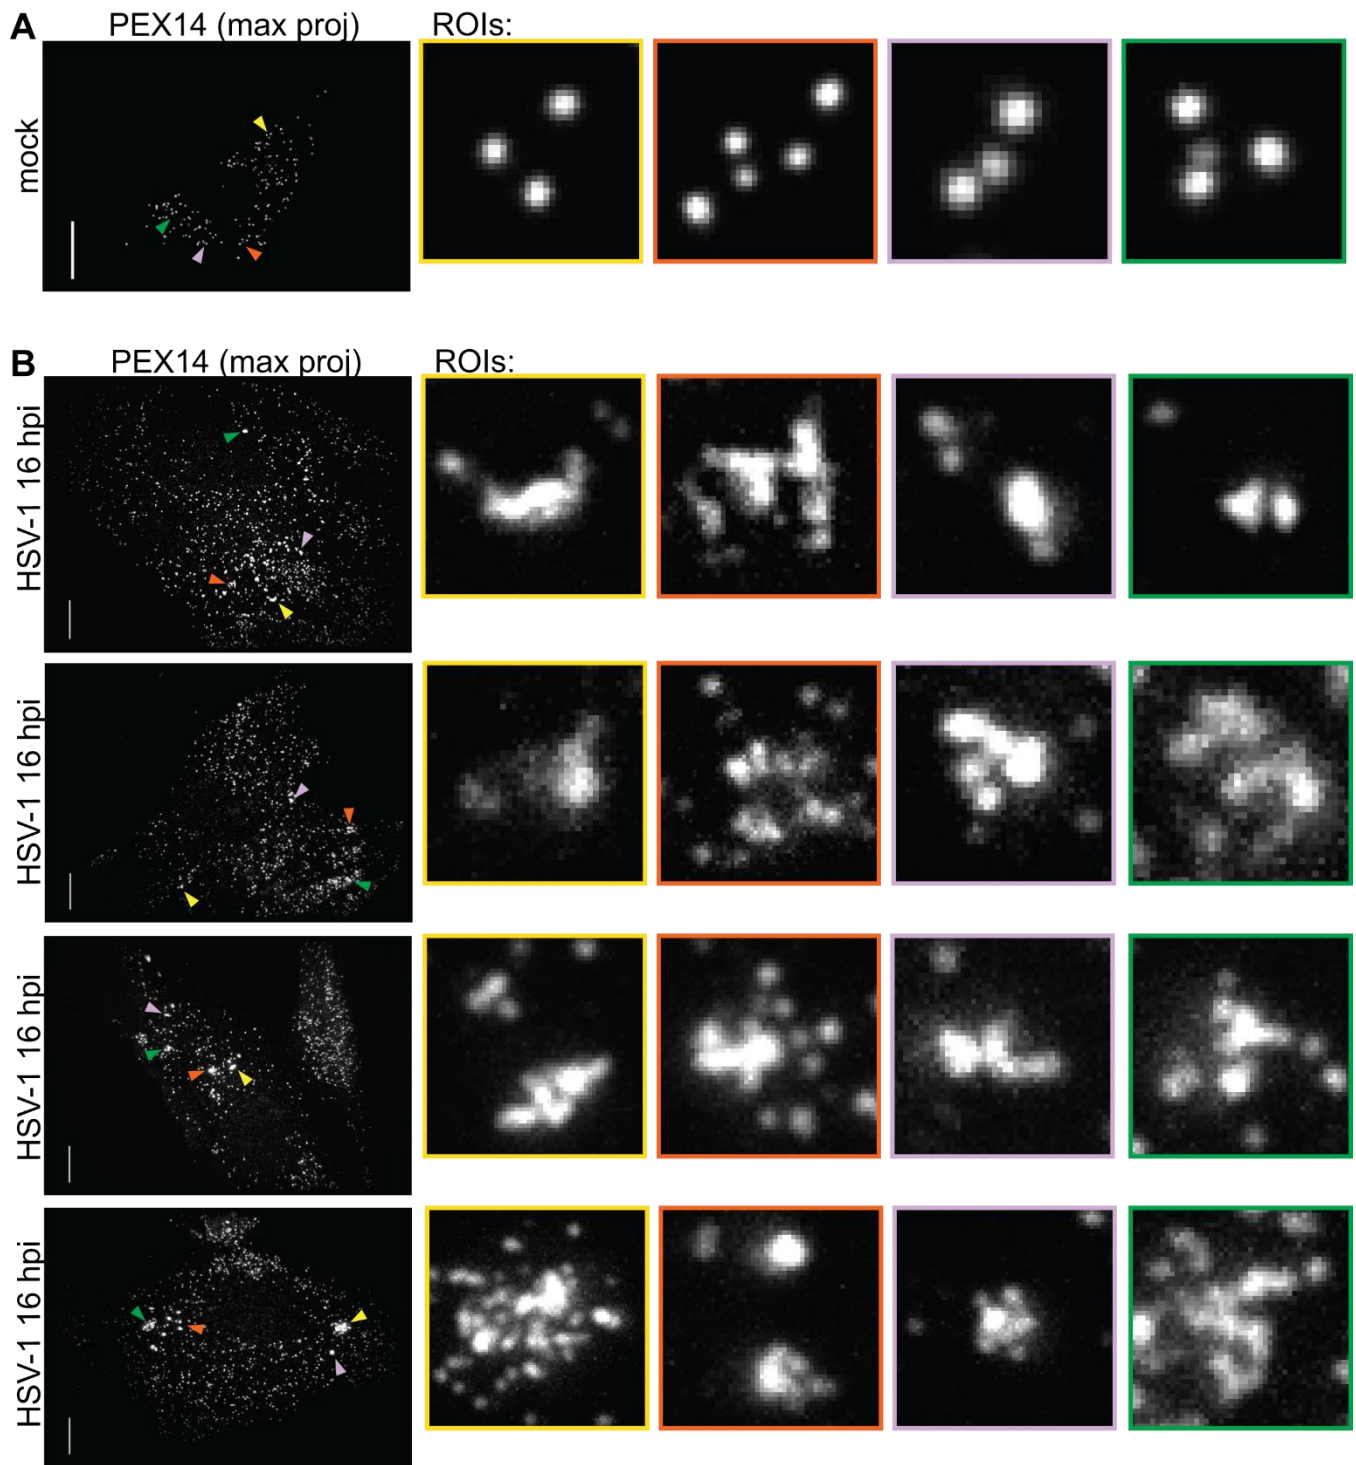

**Figure S7. HSV-1 infection disrupts peroxisome shape and size. Related to Figure 6.**

Maximum projections of A) mock and B) HSV1-infected cells at 16hpi labelled with anti-PEX14 and imaged at 100X. Arrowheads indicate ROIs in the corresponding color. Scale bars represent 10 $\mu$ m.
